# Supplementary material
Source: MDPI journal article supplement (https://www.mdpi.com/2072-4292/15/19/4707)
Supplement: s1 [file s1]

Table S1: Slope and  $r^2$  of the linear regression models between nitrogen and three canopy traits (leaf mass per area, chlorophyll a+b, and phosphorus) modeled separately for each trait. Models were developed for each elevation and soil substrate age range. Canopy traits were estimated from crown spectroscopy data using universal chemometric equations developed by Asner et al. [15].

|                           | Leaf Mass per Area |        | Chlorophyll a+b |        | Phosphorus |        |
|---------------------------|--------------------|--------|-----------------|--------|------------|--------|
|                           | Slope              | $r^2$  | Slope           | $r^2$  | Slope      | $r^2$  |
| <b>Elevation</b>          |                    |        |                 |        |            |        |
| <b>0-150</b>              | -76.8405           | 0.5371 | 4.3809          | 0.8170 | -0.0594    | 0.0274 |
| <b>150-300</b>            | -62.6388           | 0.4731 | 3.8010          | 0.8275 | -0.0146    | 0.0093 |
| <b>300-600</b>            | -75.4696           | 0.5007 | 3.7097          | 0.7687 | -0.0215    | 0.0243 |
| <b>600-900</b>            | -75.6550           | 0.4140 | 2.4701          | 0.6793 | 0.0221     | 0.0125 |
| <b>900-1200</b>           | -106.0681          | 0.4139 | 2.4923          | 0.7305 | 0.0175     | 0.0070 |
| <b>1200-1500</b>          | -95.4291           | 0.2695 | 2.2021          | 0.7743 | 0.0121     | 0.0023 |
| <b>1500-1800</b>          | -81.2976           | 0.2786 | 2.8517          | 0.8415 | 0.0543     | 0.1026 |
| <b>1800-2100</b>          | -128.0184          | 0.3163 | 2.2932          | 0.8235 | 0.0595     | 0.0549 |
| <b>2100-3000</b>          | -151.9670          | 0.3298 | 2.2403          | 0.7363 | -0.0093    | 0.0006 |
| <b>Soil Substrate Age</b> |                    |        |                 |        |            |        |
| <b>0-500</b>              | -111.4388          | 0.4080 | 3.5938          | 0.7222 | 0.0676     | 0.0686 |
| <b>500-1000</b>           | -101.3131          | 0.3857 | 2.8239          | 0.8015 | 0.0136     | 0.0034 |
| <b>1000-5000</b>          | -106.5572          | 0.4670 | 3.2230          | 0.8211 | 0.0217     | 0.0067 |
| <b>5000-15000</b>         | -102.9993          | 0.4292 | 3.4663          | 0.7327 | 0.0150     | 0.0043 |
| <b>15000-50000</b>        | -93.1436           | 0.4999 | 4.0413          | 0.8460 | 0.0052     | 0.0003 |
| <b>50000-400000</b>       | -86.5524           | 0.3738 | 3.4105          | 0.7880 | -0.0012    | 0.0001 |

## Figures

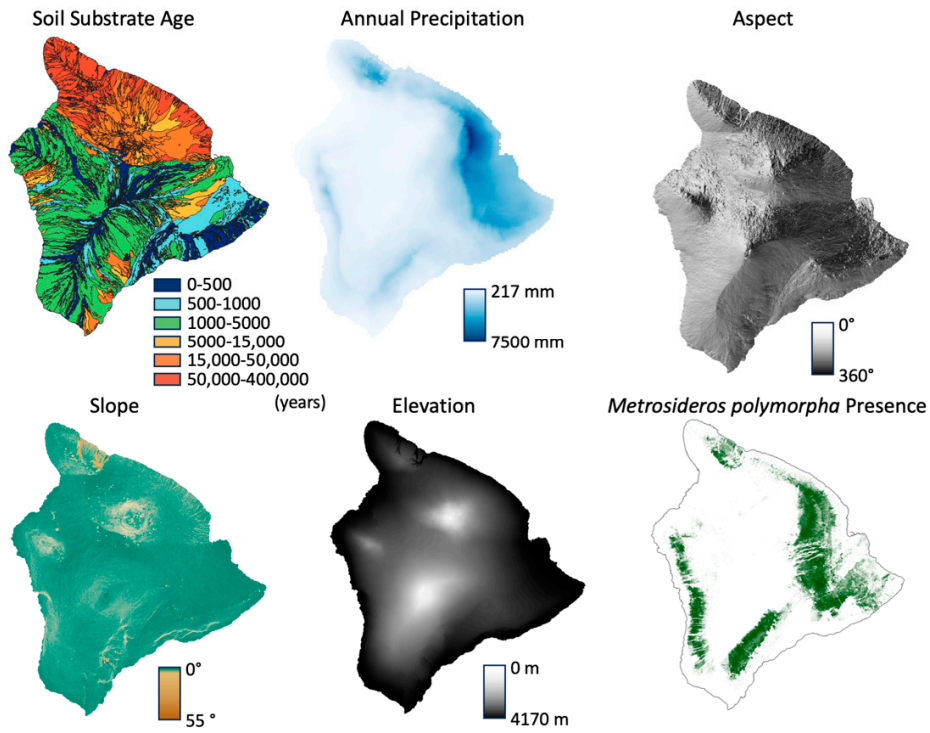

Figure S1: Spatial data of the soil substrate age, annual precipitation, aspect, slope, elevation, and *Metrosideros polymorpha* presence for Hawai'i Island. Soil substrate age spatial data were developed by the U.S. Geological Survey [27], and annual precipitation data (30-year normal from 1991-2020) were developed by the PRISM Climate Group [26]. Elevation, aspect, and slope data were derived from the Shuttle Radar Topography Mission (SRTM) digital elevation model (DEM) [25]. *M. polymorpha* presence data were developed by Seeley et al [22].
